# Supplementary material for: One-step separation and recovery of copper and sulfur by electrolysis in deep eutectic solvents
Source: Royal Society of Chemistry journal article supplement (doi:10.1039/d3gc03856d), 2024-01-01
Supplement: d3gc03856d1.pdf [file d3gc03856d1.pdf]

## Electronic Supplementary Information

### One-Step Separation and Recovery of Copper and Sulfur by Electrolysis in Deep Eutectic Solvents

Jihua Li,<sup>a</sup> Yucheng Xu,<sup>a</sup> Jinfeng Zhou,<sup>a</sup> Weijia Chen,<sup>a</sup> Shiwei He,<sup>a,b\*</sup> Zhongsheng Hua,<sup>a,b</sup> Hui Kong<sup>a,c\*</sup>

<sup>a</sup>. School of Metallurgical Engineering, Anhui University of Technology, Maanshan 243002, China

<sup>b</sup>. Wuhu Technology and Innovation Research Institute, AHUT, Wuhu 241000, China

<sup>c</sup>. Anhui International Joint Research Center for Metallurgical Process and System Science, Maanshan 243002, China

\*Corresponding Authors:

E-mail: [heshiweiahut@163.com](mailto:heshiweiahut@163.com);

[konghui@ahut.edu.cn](mailto:konghui@ahut.edu.cn)

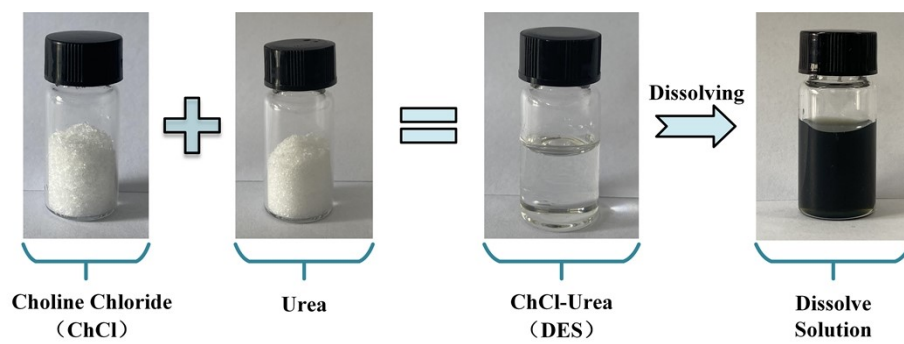

**Fig. S1** Schematic diagram of dissolution of  $\text{Cu}_2\text{S}$  in Reline DES.

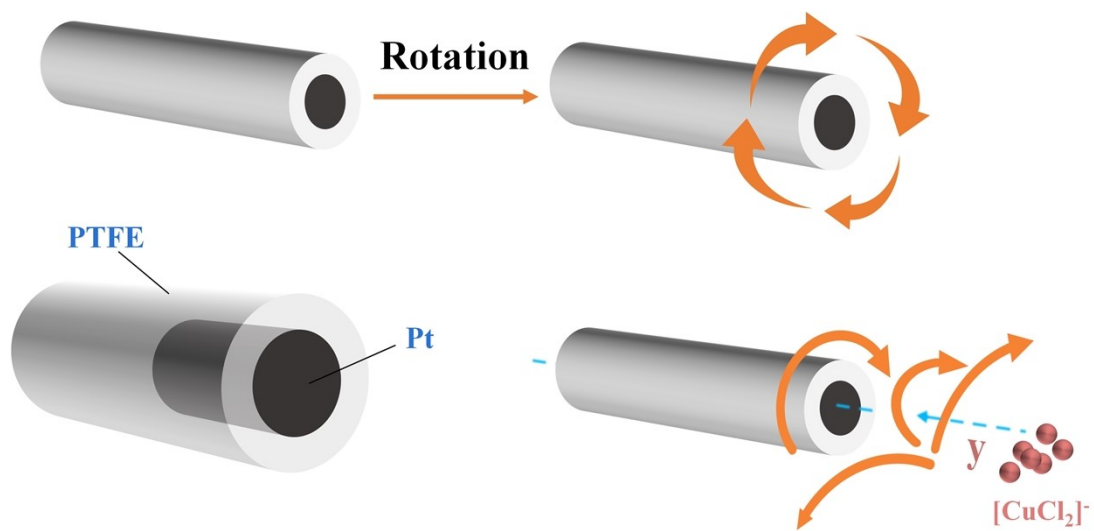

Fig. S2 Schematic diagram of rotating disc electrode (RDE)

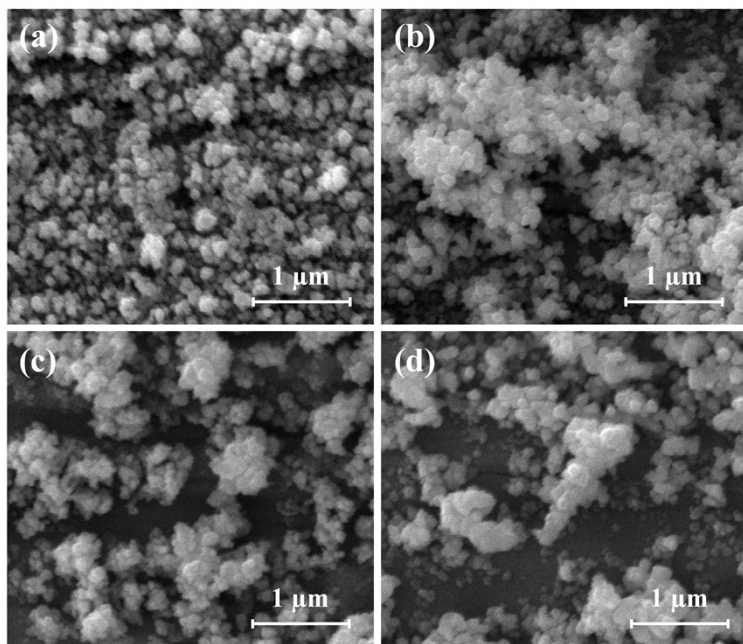

**Fig. S3** The SEM micrographs of the cathodic products after electrolysis at different temperatures in Reline-Cu<sub>2</sub>S (electrolysis voltage: 1.2 V; electrolysis time: 6 h): (a) 75 °C; (b) 80 °C; (c) 85 °C; (d) 90 °C.

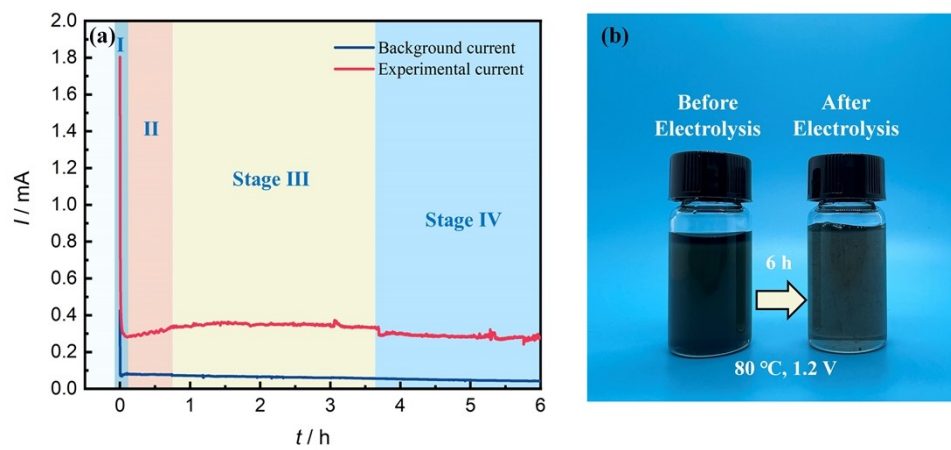

**Fig. S4** (a) Variations of cathodic current with electrodeposition time in Reline-Cu<sub>2</sub>S at 80 °C for 6h. (b) Color change of electrode before and after electrolysis.

**Table S1** Chemical reagents for experiments

| Name             | Molecular Formula | Molecular Weight | Purity      | Manufacturer |
|------------------|-------------------|------------------|-------------|--------------|
| Choline Chloride | $C_5H_{14}ClNO$   | 139.63           | $\geq 98\%$ | Macklin      |
| Urea             | $CH_4N_2O$        | 60.06            | $\geq 99\%$ | Macklin      |
| Cuprous Sulfide  | $Cu_2S$           | 159.16           | $\geq 99\%$ | Macklin      |

**Table S2** Experimental instruments and equipment

| Instrument Name                                                   | Model                                | Manufacturer                                           |
|-------------------------------------------------------------------|--------------------------------------|--------------------------------------------------------|
| Rotating Disk Electrode                                           | RRDE                                 | Taizhou Keruite Analytical Instrument Co., Ltd.        |
| Viscosimeter                                                      | NDJ-9S                               | Shanghai Lichen Bangxi Instrument Technology Co., Ltd. |
| Bench Grinder                                                     | MQD3215-C                            | Jiangsu Jinding Electric Tools Group Co., Ltd.         |
| Electronic Balance                                                | LC-FA2204                            | Shanghai Lichen Bangxi Instrument Technology Co., Ltd. |
| Constant Temperature<br>Magnetic Stirrer                          | LC-MSH-Pro                           | Shanghai Lichen Bangxi Instrument Technology Co., Ltd. |
| Digital Thermostatic Water<br>Bath                                | HH-1                                 | Changzhou Guohua Electric Appliances Co., Ltd.         |
| Constant Current Source                                           | HLR-7530D                            | Guangdong Henghuiyuan Electronics Co., Ltd.            |
| Electrochemical Workstation                                       | PARSTAT2273                          | Princeton Applied Research                             |
| Electrochemical Workstation                                       | CHI760E                              | Shanghai Lichen Bangxi Instrument Technology Co., Ltd. |
| Air Blast Drying Box                                              | Dhg-9023a                            | Shanghai Yiheng Technology Instrument Co., Ltd.        |
| Fourier Transform Infrared<br>Spectroscopy                        | Nicolet Is 10                        | ThermoFisher Scientific                                |
| Electrospray Ionisation Mass<br>Spectrometry                      | Thermo Scientific Q<br>Exactive      | ThermoFisher Scientific                                |
| Scanning Electron Microscopy<br>Energy Dispersive<br>Spectrometer | Navo Nanosem450<br>Azteccone X-Max20 | FEI (ThermoFisher Scientific)<br>Oxford Instruments    |
| X-Ray Diffractometer                                              | Rigaku D/Max-2550                    | Rigaku Corporation                                     |
| X-Ray Photoelectron<br>Spectrometer                               | Thermo Nexsa                         | ThermoFisher Scientific                                |

**Table S3** The yield, purity, and mass of the isolated products after 12 hours of electrolysis with 1.592g Cu<sub>2</sub>S dissolved in ChCl-TU DES (Cu<sub>2</sub>S concentration: 0.02 mol/L)

| Product             | Yield  | Purity    | Mass   |
|---------------------|--------|-----------|--------|
| Cathodic product Cu | 21.29% | 99.37 wt% | 272 mg |
| Anodic product S    | 20.50% | 97.51 wt% | 65 mg  |
